# Supplementary material for: Transjugular Intrahepatic Portosystemic Shunt versus Percutaneous Transhepatic Variceal Embolization for Esophageal-Gastric Variceal Bleeding in Rural China: A Retrospective Cohort Study Focusing on Survival and Rebleeding
Source: Research Square preprint supplement (doi:10.21203/rs.3.rs-8143939/v1), 2025-12-08
Supplement: Supplementary file 1 [file 743530054913dd91d7129ada.xlsx]

## Sheet: Sheet1
Personal Information	Opreation Information	Preoperative Baseline Data						Prognosis
Name	Surgical Method(0=TIPS,1=PTVE)	Bleeding Amount(0=<1000ml,1=>1000ml)	Tumor Staging(0=N,1=Y)	Child-Pugh分期（0=A,1=B)	OS(0=<6m,1=6~24m,2=>24m)	OS(days)	OS(months)	Rebleeding(0=Y,1=N)	Interval(0=<6m,1=6~12m,2=>12m)	HE(0=<6m,1=6~12m,2=>12m)	Stent Dysfunction(0=Y,1=N)
WU DX	0	1	0	0	2	1665	55.5	1	2	2	1
XU P	0	0	0	1	2	1663	55.4333	1	2	2	1
SUN XH	0	1	1	1	0	169	5.63333	1	2	2	1
LI ZQ	0	0	1	0	2	1520	50.6667	1	2	2	1
QU MY	0	0	0	0	0	127	4.23333	1	2	2	1
SHENG YL	0	0	1	1	2	787	26.2333	1	2	2	1
WANG Z	0	0	0	0	2	1478	49.2667	1	2	2	1
GAO XQ	0	0	0	0	2	858	28.6	0	2	1	1
SUN DM	0	1	0	0	2	1472	49.0667	0	2	2	1
SHI ZH	0	0	1	0	1	1431	47.7	1	2	0	1
FENG XX	0	0	1	0	1	1424	47.4667	0	2	0	1
YU XH	0	0	0	0	2	1423	47.4333	1	2	2	1
SUN SS	0	0	1	0	1	1404	46.8	1	2	0	1
LI YH	0	0	1	0	2	1383	46.1	1	2	2	1
ZHENG XC	0	0	1	0	1	993	33.1	1	2	2	1
SHI XZ	0	0	0	0	2	1368	45.6	0	2	2	0
LI ST	0	0	0	0	1	272	9.06667	0	1	0	1
ZHANG GL	0	0	0	0	2	1332	44.4	0	2	2	1
CUI LM	0	0	0	0	1	220	7.33333	1	2	1	1
TAO XS	0	0	0	0	2	1327	44.2333	1	2	1	1
WANG G	0	0	0	1	0	9	0.3	1	2	0	1
SUN XG	0	0	0	0	1	712	23.7333	0	0	0	0
ZHANG J	0	1	1	1	2	1283	42.7667	1	2	2	1
ZHI GL	0	0	0	0	2	1280	42.6667	1	2	2	1
MA SH	0	0	1	0	2	1267	42.2333	1	2	2	1
LI XZ	0	1	1	1	1	216	7.2	1	2	2	1
GAO HJ	0	1	0	0	2	1202	40.0667	1	2	2	1
WANG ZF	0	1	0	0	2	1195	39.8333	1	2	2	1
REN YY	0	0	0	0	0	40	1.33333	1	2	2	0
LIU RL	0	0	1	0	0	160	5.33333	0	0	2	1
LV ZL	0	1	0	0	2	467	15.5667	0	2	2	0
QIU LE	0	0	0	0	2	1099	36.6333	1	2	2	1
HOU XG	0	0	0	0	2	1073	35.7667	1	2	2	1
XIA JJ	0	0	0	0	2	1035	34.5	1	2	2	1
LIU XC	0	0	0	0	2	1026	34.2	1	2	2	1
LIU WH	0	0	1	1	2	224	7.46667	0	0	2	0
ZHAN XG	0	0	1	1	0	22	0.733333	1	2	0	1
DING CY	0	0	0	1	2	985	32.8333	1	2	1	1
YIN ZX	0	1	0	0	2	968	32.2667	0	2	2	1
GAO YG	1	0	0	0	1	469	15.6333	0	2	2	1
CAO XG	1	1	1	0	1	192	6.4	1	2	2	1
LIU MB	1	0	1	0	0	132	4.4	1	2	2	1
DOU MZ	1	1	0	0	0	87	2.9	1	2	2	1
LIU MY	1	0	1	0	0	60	2	1	2	2	1
ZHANG T	1	0	0	0	0	654	21.8	1	2	2	1
LIU MH	1	0	0	0	0	11	0.366667	1	2	2	1
WANG HM	1	1	0	0	0	11	0.366667	1	2	2	1
QIAO P	0	0	1	0	2	917	30.5667	1	2	2	1
WANG XH	0	0	0	0	1	689	22.9667	1	2	0	1
YIN BK	0	0	0	0	2	888	29.6	1	2	2	1
LIU DH	0	0	0	0	2	881	29.3667	1	2	2	1
JIANG MJ	1	0	0	0	1	225	7.5	0	0	2	1
GUO EH	0	1	1	0	1	408	13.6	1	2	2	1
WANG XX	0	1	0	1	2	762	25.4	1	2	2	1
ZHAO YS	0	0	0	1	2	800	26.6667	1	2	2	1
SUN RG	0	1	0	0	2	843	28.1	1	2	2	1
XIA RJ	0	0	0	0	0	112	3.73333	1	2	0	1
LIU FY	0	1	1	1	2	799	26.6333	1	2	2	1
JIANG XZ	1	0	1	1	0	20	0.666667	0	0	2	1
ZHAO XG	0	0	1	0	2	681	22.7	1	2	2	1
LV XX	1	0	1	0	0	106	3.53333	1	2	2	1
YU DQ	0	0	1	0	1	475	15.8333	1	2	2	1
GUO JH	0	0	0	0	2	617	20.5667	1	2	2	1
SUN MJ	0	0	0	0	1	444	14.8	1	2	2	1
LIU ZH	1	0	0	0	0	148	4.93333	0	0	2	1
LUO CM	0	0	0	0	2	595	19.8333	1	2	2	1
HAO HL	1	1	0	1	0	138	4.6	1	2	2	1
SU ZP	0	0	0	0	2	595	19.8333	1	2	2	1
DONG PJ	0	1	0	0	2	582	19.4	1	2	1	1
LI JB	0	0	0	0	2	539	17.9667	1	2	2	1
WANG Z	0	0	0	0	2	509	16.9667	1	2	2	1
PANG AJ	1	1	0	1	0	408	13.6	0	0	2	1
JI DF	1	1	1	1	0	39	1.3	1	2	2	1
LIU FX	0	1	0	1	2	680	22.6667	1	2	2	1
WU LL	0	1	0	0	2	674	22.4667	1	2	2	1
SUN ZH	0	0	1	0	2	161	5.36667	1	2	2	1
WEI DW	1	0	1	0	0	44	1.46667	1	2	2	1
TANG GL	1	0	0	1	0	83	2.76667	0	0	2	1
WAN FX	1	0	0	0	2	464	15.4667	1	2	2	1
WANG RQ	0	0	0	0	2	383	12.7667	1	2	2	1
CHEN XF	0	0	1	0	1	215	7.16667	1	2	2	0
SUN ZQ	1	1	0	0	1	359	11.9667	1	2	2	1
LI ZJ	0	0	0	0	1	386	12.8667	0	2	2	1
MA WM	1	1	0	0	1	210	7	1	2	2	1
WANG CP	0	1	1	1	2	366	12.2	1	2	2	1
WANG ZS	0	1	0	0	2	345	11.5	1	2	0	1
WANG CF	0	0	1	0	2	321	10.7	0	1	2	1
DAI JG	0	1	0	1	2	288	9.6	1	2	2	1
TAO ZS	0	1	0	0	2	257	8.56667	1	2	2	1
FU XZ	0	1	0	0	2	261	8.7	1	2	2	1
LIU YF	0	0	0	0	2	236	7.86667	1	2	2	1

## Sheet: Sheet2
Opreation Information		Death		6月累计生存率	1年累计生存率	2年累计生存率
Surgical Method(0=TIPS,1=PTVE)	OS		TIPS71	65（91.55）	60（84.51）	56（78.87）
			PTVE20	8（40.00）	5（25.00）	3（15.00）
0	55.5	1
0	55.4333	1
0	5.63333	0
0	50.6667	1
0	4.23333	0
0	26.2333	0
0	49.2667	1
0	28.6	1
0	49.0667	1
0	47.7	1
0	47.4667	1
0	47.4333	1
0	46.8	0
0	46.1	1
0	33.1	0
0	45.6	1
0	9.06667	0
0	44.4	1
0	7.33333	0
0	44.2333	1
0	0.3	0
0	23.7333	1
0	42.7667	1
0	42.6667	1
0	42.2333	1
0	7.2	0
0	40.0667	1
0	39.8333	1
0	1.33333	1
0	5.33333	0
0	15.5667	1
0	36.6333	1
0	35.7667	1
0	34.5	1
0	34.2	1
0	7.46667	0
0	0.733333	0
0	32.8333	1
0	32.2667	1
1	15.6333	0
1	6.4	0
1	4.4	0
1	2.9	0
1	2	0
1	21.8	1
1	0.366667	0
1	0.366667	0
0	30.5667	1
0	22.9667	0
0	29.6	1
0	29.3667	1
1	7.5	0
0	13.6	0
0	25.4	1
0	26.6667	1
0	28.1	1
0	3.73333	0
0	26.6333	1
1	0.666667	0
0	22.7	1
1	3.53333	0
0	15.8333	0
0	20.5667	1
0	14.8	0
1	4.93333	0
0	19.8333	1
1	4.6	0
0	19.8333	1
0	19.4	1
0	17.9667	1
0	16.9667	1
1	13.6	0
1	1.3	0
0	22.6667	1
0	22.4667	1
0	5.36667	1
1	1.46667	0
1	2.76667	0
1	15.4667	1
0	12.7667	1
0	7.16667	0
1	11.9667	1
0	12.8667	1
1	7	0
0	12.2	1
0	11.5	1
0	10.7	1
0	9.6	1
0	8.56667	1
0	8.7	1
0	7.86667	1

## Sheet: Sheet3
Personal Information	术前							出院时							术后一月							术后三月							术后六月
Name	HB(g/L)	PLT(x10^9/L)	RBC(x10^9/L)	PT(s)	FIB(g/L)	ALT(U/L)	AST(U/L)	HB(g/L)	PLT(x10^9/L)	RBC(x10^9/L)	PT(s)	FIB(g/L)	ALT(U/L)	AST(U/L)	HB(g/L)	PLT(x10^9/L)	RBC(x10^9/L)	PT(s)	FIB(g/L)	ALT(U/L)	AST(U/L)	HB(g/L)	PLT(x10^9/L)	RBC(x10^9/L)	PT(s)	FIB(g/L)	ALT(U/L)	AST(U/L)	HB(g/L)	PLT(x10^9/L)	RBC(x10^9/L)	PT(s)	FIB(g/L)	ALT(U/L)	AST(U/L)
WU DX	53	21	2.69	16.5	1.5	20	13	81	57	3.48	15	3.51	47	24	91	34	4.32	15.7	2.2	22.9	26.6	84	26	3.81	15.4	2	8.4	12.9	96	38	4.22	15.8	2.09	19.7	21
XU P	109	71	3.78	14	2.1	-	-	118	107	4.03	14.4	1.99	-	-	124	97	3.98	14	2.49	20	28.8	125	130	3.55	12	3.15	18	23.5	131	128	4.25	12	2.7	13	25
SUN XH	93	107	2.58	16.9	1.35	107	71	78	86	2.26	16.9	1.33	32.5	27.5	82	112	3.46	15	1.85	7	15.8	75	70	3.09	16.3	1.56	74	132.6
LI ZQ	91	116	2.64	16	1.71	21	29	83	70	2.42	19.1	1.59	68	49	118	96	3.59	17.4	2.2	44	19.9	132	83	4.03	17.1	2	18.1	41.9	143	96	4.24	18.8	2.62	15.7	33.3
QU MY	70	42	1.97	19.3	1.15	9.6	36.9	72	56	2.07	20.6	1.23	3	32.9	58	55	1.6	20.2	1.14	12.9	50.3	69	67	2	21	1.52	-	-
SHENG YL	116	80	3.34	17.9	2.19	126.5	167.2	113	92	3.23	20.2	1.52	24	46	117	140	3.46	16	2.49	13	27.6	99	68	2.92	18.3	1.61	32.8	58.9	120	71	3.31	17.5	1.54	26.4	50.3
WANG Z	138	37	4.42	18.5	1.84	26	23.5	122	20	3.92	21.2	1.71	143.9	58.4	113	57	3.74	18.8	1.87	35	47	125	78	4.4	16.6	2.15	20	20	134	101	4.51	14.1	2.55	28	27.5
GAO XQ	81	153	3.65	17.5	1.57	25.5	37	90	124	3.73	13	2.86	28.7	30.5	108	177	3.73	13	2.56	17	20	110	187	4.31	13	2.87	18.9	27.1	103	97	3.74	14.1	2.51	10.5	8.7
SUN DM	92	53	3.68	15.4	2.12	27	24	85	47	3.2	14.1	2.4	85.9	51.2	106	78	4.1	16.8	1.96	32.9	26.6	107	48	4.31	17.3	2.01	19	25	107	72	3.33	17	2.17	8.9	12.3
SHI ZH	72	73	2.33	14.8	2.16	34	33	87	69	2.93	18.4	1.84	104.4	78.6	96	75	3.19	17.3	1.54	84	132.8	100	72	3.05	17.3	2.42	31.8	50.7	108	82	3.23	21.9	2.34	47.1	60
FENG XX	138	159	4.4	13.8	2.51	25	27	113	83	3.54	17.2	1.55	10.9	23.9	139	76	4.25	40.5	1.56	24.1	32.8	132	95	3.85	18.5	1.75	19.8	24.4	119	104	3.48	17.1	2.17	24.3	39.9
YU XH	96	69	3.89	16.3	1.85	17	19	87	56	3.46	18.1	1.67	10.7	20.2	89	60	3.85	17	1.65	5.5	21	94	57	3.39	16.6	1.69	13	34.1	110	121	4.1	14.1	3.5	21	20
SUN SS	117	87	3.76	17.2	3.45	18.7	29.7	96	75	3.05	18	2.43	65.4	105.5	118	77	3.64	25.3	2.21	10.2	26.6	133	105	4.03	15.8	2.32	21.9	43.9	146	104	4.38	17.4	2.03	29.6	44.4
LI YH	110	112	4.15	16.9	1.61	34	25	70	33	2.62	17.6	1.82	44.9	36.7	82	44	3.34	18.1	1.58	25.7	20.9	105	66	4.62	16.1	2.49	31	41	118	36	4.56	17.5	1.73	28	35
ZHENG XC	104	34	2.9	16.7	1.66	22.7	34.7	99	40	2.86	37.8	2.35	17	35.5	75	34	1.98	15.8	2.36	20.2	27.6	98	41	2.72	14.9	2.18	22.6	31.7	96	52	2.73	16	2.97	10.7	19.9
SHI XZ	93	36	2.6	16.6	1.56	33	44	94	29	2.78	15.8	2.78	26	27	103	40	3.07	15.1	3.09	12.5	20.4	111	34	2.56	15.8	1.69	28	37.3	97	36	3.01	14.5	1.32	16.5	29.8
LI ST	45	50	1.57	21.9	1.12	15	40	88	76	3	18.5	1.56	25.8	31	93	78	3.08	16.7	1.73	28.2	34.9	93	75	2.99	27.8	1.85	20	30	66	143	2.26	15.6	2.66	15	32
ZHANG GL	118	61	3.65	22.1	1.28	30	32	72	34	2.3	19.8	1.55	13.8	18.9	128	33	4.13	24.4	1.58	22.9	34	128	32	3.95	20.2	1.28	23.9	38.5	117	26	3.73	20.3	1.25	16	24
CUI LM	58	38	2.73	17.5	1.73	10	22.2	91	33	3.45	16.6	2.29	27	30	94	23	3.18	18.4	1.6	24	37	94	32	2.8	19.7	1.55	16.9	27.1	41	35	1.09	-	-	20.3	23.2
TAO XS	108	92	3	17.3	2.14	26.7	24.5	99	66	3.04	15.8	2.27	61.1	28.8	113	42	3.44	16.7	2.48	60	48	115	67	3.09	15.8	3.17	30.6	34.5	130	63	3.3	15.2	2.8	30.1	28.7
WANG G	109	90	3.17	17.7	1.58	51	59	114	113	3.2	29.9	0.77	134	301
SUN XG	92	367	4.01	12.1	2.4	7.7	23.6	66	225	2.85	15	2.77	12.2	18.2	107	257	4.73	14	2.16	27.9	33.9	127	184	4.55	14	2.73	26.6	32.1	120	151	4	13.5	3.03	34.5	42.6
ZHANG J	90	44	3.63	20.4	1.47	20	52	72	28	2.6	19.8	1.04	44.4	17.4	82	31	3.36	17.5	1.7	14.6	28	71	23	2.96	17.1	1.7	12.3	22.3	103	34	4.14	19.4	1.74	23.1	34.1
ZHI GL	63	42	3.09	17.4	1.65	28	29	71	37	3.09	15.2	1.62	19.1	21.2	72	29	3.12	16	1.81	16.7	14.1	96	36	3.86	27.6	1.45	18	29.8	127	33	4.13	16	1.78	21.6	28.6
MA SH	60	88	2.43	15.7	1.52	17	29	88	69	3.39	14.8	1.04	40.5	45	97	34	3.39	17.3	1.51	27.5	48.1	117	49	4.41	16.3	1.91	46.5	36	124	42	4.13	16.2	2.17	29	29.9
LI XZ	51	60	1.68	15.4	1.67	70	91	77	49	2.51	20.8	0.94	588.9	131.6	93	102	3.64	15.8	1.73	33.2	51.9	111	98	4.12	13.7	2.42	46.1	143.1	107	221	3.56	13.8	2.45	73.1	287.3
GAO HJ	63	21	2.51	20.9	1.11	10	21	74	30	2.9	18.5	1.59	60.2	67.3	86	46	3.45	20.3	1.72	28.9	33.2	69	23	2.94	21.2	1.94	28.4	25.2	107	43	3.7	20.9	1.58	17.1	30.6
WANG ZF	60	87	2.65	20.3	0.6	11	18	74	29	2.87	17.6	3.12	21.7	28	99	84	3.87	16.3	2.04	20	24.5	100	79	3.92	18	2.09	17.4	32.3	119	82	4.43	16	2.07	13.9	20.7
REN YY	91	26	2.82	14.1	1.4	10.6	19.8	72	30	2.2	17.2	2.93	13.5	20.1
LIU RL	85	118	3.31	15.5	2.34	5.2	13.8	77	98	2.99	14.6	1.57	28	63.9	84	84	2.92	15	3.32	34.6	61.6	125	58	3.93	14.6	4.02	45.1	66.3
LV ZL	72	206	3.18	16.1	1.89	11.3	20.6	61	114	2.66	16.8	1.94	30.1	31.7	107	253	4.29	16.3	2.56	61.4	64.7	123	287	5.22	15.3	2.46	26.2	34.4	79	238	2.74	15.6	2.28	25	31.1
QIU LE	139	133	4.05	15.5	1.9	40	10.1	137	85	3.95	18.9	1.9	37.3	29.8	142	107	4.02	15.7	1.85	60	75.6	133	118	3.67	18.9	2.08	33.2	46.2	128	143	3.71	15.7	2.21	39.2	36.1
HOU XG	93	101	3.48	14.9	2.44	20	36	70	52	2.72	16.7	1.84	136.9	109.4	81	60	3.25	15.6	3.2	34.8	39	88	58	4.19	14.2	3.64	27.7	31	83	81	4.64	15.3	1.97	12.1	24.2
XIA JJ	94	66	3.14	15.3	2.05	26	37	83	47	2.78	16.8	1.68	25	26	111	65	3.47	16	2.39	22	28.7	113	108	3.36	13.8	3	21.9	36.5	101	59	2.97	14.4	2.67	24.2	28.6
LIU XC	77	21	2.5	16.7	1.23	21.9	26	97	46	3.23	15.8	2.66	32	46.2	107	88	4.11	17.4	2.14	26.6	31.6	119	50	3.72	16.9	2.27	29.9	40.5	128	38	3.92	17.2	1.92	19.3	24.7
LIU WH	97	92	3.41	17.5	2.11	53.6	86.4	78	62	2.78	22.8	2.85	136.2	66.9	70	62	2.56	19.6	2.46	43.2	68.5	86	77	3.51	18.3	3	45.4	74	81	77	2.64	18.7	2.16	350	114
ZHAN XG	62	76	1.8	15.9	1.37	48.2	79.6	74	50	2.69	18.3	1.5	121.7	254.6	85	67	2.56	18.4	2.35	17.5	28.3
DING CY	96	75	3.57	18.1	1.69	24	48	76	37	2.74	17.6	2.16	103	89	101	81	3.58	16.6	2.5	31.2	29.7	76	68	2.85	20.7	2.91	10.7	17.5	115	102	4.36	18.8	2.54	32.4	46.3
YIN ZX	73	23	2.43	16.4	0.64	23.9	16.2	96	31	3.3	26.1	1.53	20.8	16.9	101	36	3.69	19.6	1.58	18.6	12.1	106	32	3.97	19.4	1.53	15.8	10.9	140	96	4.42	16.4	2.85	16.1	14.6
GAO YG	127	106	4.17	17.7	2.48	56	54	94	443	3.25	17.9	4.27	36.5	55.2	72	235	2.79	18	2.66	20.3	45.2	95	385	4.01	15.8	4.93	35	39.7	98	369	4.55	16.7	4.17	14	27.7
CAO XG	118	217	3.8	14.4	4.22	62	151	92	172	2.97	14.7	3.51	82.3	148.1	84	171	2.74	15	4.07	86.8	222.9	77	177	2.47	15.1	4.1	56.5	188	104	330	3.36	13.3	5.36	81.4	343.8
LIU MB	120	69	3.19	16.9	2.27	43	77	106	72	3.09	14.2	2.77	35.5	87.7	115	104	2.71	16.6	1.98	117.5	451.1	85	91	0.91	20.2	0.81	256.7	644.2
DOU MZ	91	94	2.81	15.1	2.56	29	24	83	104	2.5	17.4	2.12	10.1	24.1	83	104	2.5	17.4	2.12	10.1	24.1
LIU MY	97	81	4.1	16.2	2.01	20.7	32.7	87	51	3.7	19	1.56	214.4	298.1	85	34	2.87	19	1.22	440.8	357.5
ZHANG T	181	81	5.38	15	3.08	32	100	160	95	4.76	15	3.01	18.2	81.9	145	141	4.6	15.1	3.33	40	107	145	103	4.62	14	2.53	38.2	46.9	162	92	5.17	16.2	1.7	94.3	90.6
LIU MH	32	86	2.05	18.1	1.55	39	65	61	24	2.3	20.5	0.92	45.1	22.1
WANG HM	94	71	3.01	17.2	1.74	19	30	64	88	2.08	21	1.97	35	74
QIAO P	67	173	2.03	14.3	3	28	41	76	244	2.71	15.8	3.71	42.3	75.1	71	228	3.15	15.3	2.75	23.4	26.2	108	249	4.8	15	3.27	24.2	40.3	113	206	4.94	16.3	2.83	42	44
WANG XH	124	49	3.81	18	3.05	28	30	94	63	2.97	18.5	1.89	55.2	51	142	39	4.29	16.1	2.52	45.1	55.3	114	31	3.36	21.6	2.48	26.1	40.7	127	41	3.84	16.1	2.33	27.2	60.1
YIN BK	78	25	3.68	16	1.62	18.3	20.7	91	68	3.99	17	2.65	69.7	24.2	124	38	4.52	17.2	1.74	29.1	44.7	104	36	3.06	25	2.33	11.7	26.8	131	61	4.01	16.5	2.25	13.8	19.9
LIU DH	74	65	2.65	16	1.53	16	17	87	60	3.04	16.7	4.37	21.7	13.6	103	109	3.56	15.5	3.5	21.3	28.7	99	57	3.81	16.4	1.81	20.3	25.2	91	62	3.78	21.7	1.7	11.5	17.8
JIANG MJ	71	114	2.25	16.8	1.32	7.3	15.5	90	71	2.94	16.3	2.49	27.9	60.3	113	100	3.8	15.3	3.13	16.4	56.1	96	62	3.04	13	3.53	22.7	83.1	66	79	2.13	16.5	2.24	60	227
GUO EH	69	109	3.01	12.2	3.65	25.6	27	91	382	3.78	14.1	2.98	46.5	55.1	107	459	4.48	14.1	4.11	20.5	31.6	118	379	4.1	14	5.7	20	30.5	91	241	3.15	14.7	7.52	36.1	41.3
WANG XX	61	31	2.41	18.1	1.59	35	149	77	52	2.86	17.2	1.63	27.5	74.9	89	85	3.15	33.5	1.96	56.2	77.5	112	88	3.36	26.2	2.22	26.7	46.1	127	115	3.73	16.2	2.45	31.5	79.6
ZHAO YS	137	72	3.1	14.3	2.19	44	71	123	61	3.32	17	1.53	24.7	34.6	145	54	3.95	22.4	2.27	31.3	48.6	102	95	2.84	21.2	2.12	14.2	32.8	99	79	2.68	19.4	2.05	19	29
SUN RG	70	45	2.61	14.1	1.54	28.3	24.8	75	55	2.83	15.4	2.78	94.9	70.6	72	55	2.8	16.1	2.47	30.5	36.3	92	78	4.32	16.3	2.53	30.3	32.9	88	51	4.36	16.5	2.01	23.6	23.6
XIA RJ	82	55	2.85	26.5	0.6	19	28	82	50	2.86	21.1	1.87	19	33	89	60	2.93	23.7	2.42	42.3	41.7	73	145	2.27	21.2	0.94	21	25
LIU FY	69	48	2.16	15.3	1.98	42	50	75	88	2.38	15.9	1.86	217.9	293.4	81	52	2.48	15.8	2.72	27.2	42.2	101	70	3.02	15.9	2.59	32.3	51.1	95	90	2.69	16.2	2.73	41	62
JIANG XZ	68	95	2.09	17.4	2.17	83.8	93.6	78	54	2.35	21.9	1.84	79.3	39
ZHAO XG	78	38	3.15	19.9	1.13	23	43	93	31	3.4	18.3	1.43	11.9	16.7	119	53	4.43	16.6	2.13	36.5	39.3	151	48	4.45	15.1	2.46	24	37.4	135	141	3.58	14.4	2.46	38.5	47.2
LV XX	116	37	4.01	14.9	2.7	23.6	34.5	101	39	3.58	15	2.37	21.1	38.1	100	95	3.63	15.3	2.82	31	57	104	88	3.62	-	-	47	68.6
YU DQ	74	102	2.96	14.6	2.11	29	31	74	101	2.92	15.7	2.33	26	34.6	78	157	3.25	-	-	11.5	15.9	71	99	3.08	15.6	2.24	14.5	18.8	60	166	2.59	15.6	2.2	23	25
GUO JH	74	148	74	15.8	2.18	28	47	72	158	2.64	14	2.77	30.9	50.8	94	179	3.48	14.2	3.61	22.8	42.1	101	174	4.08	-	-	38.3	65.9	112	180	4.56	13	2.77	43.1	72.3
SUN MJ	87	95	2.72	14.9	2.37	19.5	19.4	88	165	2.78	15.7	3.32	83.3	31.9	96	152	3.26	16.4	2.59	21.1	24.4	121	163	4.17	16.4	2.55	17.3	40.6	95	78	2.09	16.4	2.35	48.5	78
LIU ZH	41	95	1.65	17.5	1.45	26	27	74	93	2.7	17.5	1.73	60.7	120.8	-	-	-	-	-	-	-	79	133	3.1	16.5	1.75	36	59	62	163	2.48	17.7	1.6	26	53
LUO CM	65	124	2.3	14.5	2.25	15.1	20	67	96	2.46	14.1	2.32	10.8	11	-	-	-	-	-	-	-	-	-	-	-	-	-	-	80	182	3.61	16.6	2.1	10.8	11
HAO HL	70	95	2.29	17.9	3.52	1622	1550	89	164	2.93	15.2	3.14	588.6	78.4	90	255	2.89	15.3	2.12	17	21	69	184	2.3	14.7	1.78	22	28	96	367	3.02	23.8	1.9	17	40
SU ZP	68	91	3.16	17.9	1.69	23	26	93	70	3.95	18.8	1.64	214.2	128.9	108	73	4.63	16.4	2.36	38.8	49.1	119	84	4.9	14.1	2.3	28.4	46.4	136	71	5.11	14	2.23	38.9	55.3
DONG PJ	69	70	2.28	18	1.27	36	39	72	46	2.33	16.8	1.56	100.1	67	107	79	3.51	19	1.55	30.5	52.1	88	52	2.8	20.8	1.58	41.9	68.1	99	50	2.88	19	1.62	23.6	39.9
LI JB	75	78	2.45	14.8	3.27	7.9	35	84	108	2.77	16.5	2.84	19.9	21	86	69	2.62	14.5	4.81	16.2	46	100	83	3.03	14.5	3.52	21.5	59.5	103	90	3.17	14	3.18	19.2	51
WANG Z	67	212	2.61	15.1	1.72	18	22	60	96	2.23	14.5	2.16	23.4	36	77	100	3.3	15.3	2.11	12	23.1	113	118	3.99	16.5	2.25	15.8	28.2	132	119	4.37	14.5	3.58	11.5	21.4
PANG AJ	84	146	2.65	13.5	3.89	193.8	351	91	48	2.87	14.3	6.56	57.6	118.8	76	152	2.55	15.5	4.15	42	157
JI DF	72	69	2.64	17.1	2.48	116	189	71	73	2.81	16.9	1.54	163.4	124.7	75	53	3.98	18.4	3.37	13.9	20.9
LIU FX	61	81	1.77	16.4	2.25	43	63	71	93	2.15	15.4	2.04	49.2	83.1	97	227	3.07	14	3.15	45.6	53.8	113	131	3.86	14.1	3.16	70.5	104	118	143	3.91	14.4	3.4	36	50.1
WU LL	31	40	1.2	20.4	1.19	23	27	69	49	2.45	16.1	2.21	15.1	11.8	82	46	3.13	16.5	1.71	25	36.7	108	112	4.24	15.9	2.02	40.1	49.4	137	126	4.09	14.5	2.52	16.7	24.5
SUN ZH	80	74	2.81	17.1	1.63	18.1	37.1	73	81	2.66	16.9	1.2	11.3	19.9	80	120	3.07	17.4	1.82	7.5	21.2	82	113	2.84	15.9	2.45	11.6	36.8	100	142	3.88	16.1	2.57	17	26
WEI DW	73	40	2.33	15.9	2.35	2.6	7.2	80	24	2.53	15.9	2.39	2.8	6.1	65	9	2.09	16.4	1.95	11	13
TANG GL	57	124	2.06	18.1	0.98	110.9	175.1	76	127	2.98	16.4	2.3	93	115	74	104	3.2	16	1.83	151.2	217.7	94	148	3.7	16.3	1.97	183.3	311.5
WAN FX	98	78	3.19	18	1.62	35	47	69	36	2.34	18	1.54	41	36	69	36	2.34	18	1.54	41	36	74	54	3.94	15.5	2.45	25	26	89	102	4.55	14	3.12	20	26
WANG RQ	136	214	4.73	13.7	2.31	33.7	17.1	105	113	3.72	14.1	3.35	172.3	164.3	125	163	4.17	14	3.52	9.7	21.5	129	161	4.22	14.1	3.25	10.5	23.2	131	159	4.24	14	3.35	25	34.2
CHEN XF	101	236	2.99	14.4	3.35	20	24.1	103	215	3.09	15.6	2.48	270.3	152.8	95	182	2.9	14.5	2.66	43.9	51.2	91	123	2.73	15.5	1.47	20.6	23.1	71	125	2.77	91.3	2.91	23.7	69.2
SUN ZQ	149	110	4.31	14.6	2.15	26	63	119	63	3.4	14.4	1.68	17.2	41.9	130	78	4.01	14.4	1.87	20	24	131	107	4.28	14.4	2.11	24.4	28.6	163	179	5.59	12.1	3.82	11.8	25.2
LI ZJ	67	32	2.04	20.5	1.83	26	54	77	46	2.22	21.3	1.61	27.8	51.8	76	38	2.06	17.7	2.16	30.8	51.5	110	47	3.04	17.6	2.25	32.4	73.6	108	48	3.07	17.3	2.85	25	51.7
MA WM	51	152	1.85	17.1	1.69	23	29	76	116	2.53	13.6	2.09	37	41	80	164	3.27	13.7	1.88	20	20	106	97	3.68	15	2.15	21.1	20.3	112	98	3.54	22.5	3.8	21	20
WANG CP	77	66	2.6	17	1.74	49	48	90	48	2.99	19.5	1.77	524.8	72.3	116	56	3.76	18.4	2.21	69.9	93.4	134	56	4.32	16.5	2.55	39.2	58.3	142	65	4.43	14.4	2.85	68.8	66.3
WANG ZS	89	54	2.9	16.1	1.52	30	40	73	72	2.44	17.4	1.75	27.6	24.9	72	64	2.85	17.8	2.15	24.1	23.4	87	53	3.81	17.6	2.52	24.6	34.6	79	56	3.33	17.8	3.25	15.9	21.9
WANG CF	117	40	4.01	16.2	2.4	21.6	23.9	116	58	3.99	17.6	2.43	142.6	131	103	60	3.56	16.6	2.93	46	53.6	112	60	3.83	17.6	1.82	79.3	152.9	88	70	2.92	16.3	3.11	29	81.9
DAI JG	90	73	3	16.8	1.67	54	52	84	81	2.91	18.1	1.39	105.2	120.3	93	70	3.59	16.4	1.86	44.6	68.1	100	69	4.22	17.7	1.93	41.7	65.4	110	78	4.51	18.7	1.71	22	35.9
TAO ZS	55	89	2.01	16.5	1.47	17	26	82	98	2.81	18.1	1.46	14.8	25.4	101	155	3.52	17.4	1.84	22.5	50.1	99	139	3.53	16.4	2.1	23.8	47.3	110	215	3.39	16.6	1.98	25.8	43.9
FU XZ	72	62	2.18	18.3	1.53	13	43	78	98	2.49	16.6	1.78	79.7	179	92	64	2.91	18.2	1.31	43	68.5	93	73	3.05	18.1	1.26	34.1	55.8	108	72	3.29	16.6	2.12	27.5	47.2
LIU YF	98	119	3.24	14	2.9	32	32	76	119	2.63	15.7	1.8	48.7	40.5	99	140	3.94	14.5	2.1	11.6	22.6	102	119	4.22	14.1	2.58	11	23.4	107	121	3.86	14.2	3.27	110.4	142.4

## Sheet: Sheet4
Personal Information		Preoperative Baseline Data													Prognosis
Name	Hospital Stay(0=<7d,1=7~13d,2=>13d)	Bleeding Amount(0=<1000ml,1=>1000ml)	HBV(0=Y,1=N)	ALC(0=Y,1=N)	Tumor Staging(0=N,1=Y)	Thrombosis Degree(0=N,1=Y,2=CTPV)	Diversion(0=Y,1=N)	Surgical Method(0=TIPS,1=PTVE)	EGV Degree(0=1,1=2~5,2=>5)	HV(0=RHV,1=MHV)	PV(0=RPV,1=MPV,2=LPV)	Pre-PPG(cmH2O)	Post-PPG(cmH2O)	PPG Difference(0=<10,1=10~20,2=>20)	Rebleeding(0=Y,1=N)	Interval(0=<6m,1=6~12m,2=>12m)	HE(0=<6m,1=6~12m,2=>12m)	Stent Dysfunction(0=Y,1=N)
WU DX	1	1	0	1	0	1	1	0	0	1	2	34	17	1	1	2	2	1
XU P	1	0	0	1	0	1	1	0	0	0	0	32	12	1	1	2	2	1
SUN XH	0	1	1	0	1	1	1	0	0	1	2	32	15	1	1	2	2	1
LI ZQ	1	0	0	0	1	0	0	0	1	0	2	40	10	2	1	2	2	1
QU MY	1	0	0	1	0	0	1	0	1	1	2	35	15	1	1	2	2	1
SHENG YL	2	0	0	0	1	1	0	0	0	1	1	22	14	0	1	2	2	1
WANG Z	1	0	0	1	0	0	0	0	0	1	1	55	20	2	1	2	2	1
GAO XQ	1	0	1	0	0	2	0	0	1	1	1	42	24	1	0	2	1	1
SUN DM	1	1	1	0	0	0	1	0	1	0	0	40	17	2	0	2	2	1
SHI ZH	1	0	0	0	1	1	1	0	1	0	0	35	15	1	1	2	0	1
FENG XX	1	0	0	1	1	0	1	0	1	1	0	30	5	2	0	2	0	1
YU XH	2	0	0	1	0	0	0	0	1	0	2	26	11	1	1	2	2	1
SUN SS	2	0	1	0	1	1	1	0	1	0	1	35	20	1	1	2	0	1
LI YH	0	0	0	0	1	0	1	0	1	0	1	35	20	1	1	2	2	1
ZHENG XC	1	0	0	1	1	0	1	0	1	1	1	35	20	1	1	2	2	1
SHI XZ	1	0	1	0	0	1	0	0	1	1	2	35	10	2	0	2	2	0
LI ST	1	0	1	0	0	1	1	0	1	1	2	37	20	1	0	1	0	1
ZHANG GL	1	0	0	0	0	0	0	0	1	0	0	35	22	1	0	2	2	1
CUI LM	2	0	0	1	0	0	1	0	1	0	0	40	10	2	1	2	1	1
TAO XS	1	0	1	0	0	0	0	0	1	0	0	50	15	2	1	2	1	1
WANG G	1	0	1	0	0	0	0	0	1	1	2	37	20	1	1	2	0	1
SUN XG	1	0	0	1	0	1	0	0	1	1	0	50	25	2	0	0	0	0
ZHANG J	1	1	0	0	1	1	1	0	1	0	0	44	20	2	1	2	2	1
ZHI GL	1	0	0	0	0	1	1	0	0	0	2	27	10	1	1	2	2	1
MA SH	0	0	0	1	1	1	0	0	1	0	2	45	13	2	1	2	2	1
LI XZ	1	1	0	0	1	0	1	0	1	0	0	23	4	1	1	2	2	1
GAO HJ	0	1	0	0	0	0	1	0	0	0	2	35	15	1	1	2	2	1
WANG ZF	1	1	0	1	0	0	0	0	1	1	2	20	8	1	1	2	2	1
REN YY	1	0	1	1	0	0	1	0	1	0	2	20	10	0	1	2	2	0
LIU RL	1	0	1	1	1	1	1	0	1	0	0	30	15	1	0	0	2	1
LV ZL	1	1	0	1	0	2	0	0	1	1	1	35	20	1	0	2	2	0
QIU LE	1	0	0	1	0	0	1	0	2	1	2	30	14	1	1	2	2	1
HOU XG	1	0	1	0	0	0	1	0	0	1	0	32	20	1	1	2	2	1
XIA JJ	1	0	1	1	0	0	1	0	0	1	0	30	20	0	1	2	2	1
LIU XC	1	0	0	1	0	1	1	0	0	1	0	45	20	2	1	2	2	1
LIU WH	1	0	0	0	1	2	0	0	1	0	2	67	42	2	0	0	2	0
ZHAN XG	1	0	0	1	1	1	0	0	1	0	2	35	10	2	1	2	0	1
DING CY	1	0	1	1	0	0	1	0	1	1	2	45	12	2	1	2	1	1
YIN ZX	1	1	0	1	0	0	1	0	0	1	2	50	25	2	0	2	2	1
GAO YG	1	0	1	0	0	0	1	1	1	-	-	-	-	-	0	2	2	1
CAO XG	2	1	0	1	1	2	1	1	1	-	-	-	-	-	1	2	2	1
LIU MB	2	0	0	1	1	1	0	1	0	-	-	-	-	-	1	2	2	1
DOU MZ	2	1	1	1	0	2	0	1	0	-	-	-	-	-	1	2	2	1
LIU MY	1	0	0	1	1	1	1	1	0	-	-	-	-	-	1	2	2	1
ZHANG T	1	0	0	1	0	1	0	1	1	-	-	-	-	-	1	2	2	1
LIU MH	1	0	0	1	0	0	1	1	0	-	-	-	-	-	1	2	2	1
WANG HM	1	1	1	0	0	0	0	1	1	-	-	-	-	-	1	2	2	1
QIAO P	2	0	1	0	1	0	0	0	0	0	0	20	15	0	1	2	2	1
WANG XH	2	0	0	1	0	1	0	0	0	0	1	27	15	1	1	2	0	1
YIN BK	2	0	0	1	0	1	1	0	0	1	2	33	26	0	1	2	2	1
LIU DH	1	0	0	1	0	0	1	0	0	0	0	38	1	2	1	2	2	1
JIANG MJ	2	0	0	1	0	2	1	1	1	-	-	-	-	-	0	0	2	1
GUO EH	1	1	1	0	1	1	1	0	2	0	1	20	3	1	1	2	2	1
WANG XX	0	1	1	0	0	0	1	0	1	1	2	24	4	1	1	2	2	1
ZHAO YS	1	0	0	0	0	2	0	0	0	1	1	30	18	1	1	2	2	1
SUN RG	1	1	0	1	0	0	1	0	0	1	0	18	7	1	1	2	2	1
XIA RJ	2	0	1	0	0	2	0	0	1	0	2	25	15	0	1	2	0	1
LIU FY	1	1	0	1	1	0	1	0	1	1	2	28	10	1	1	2	2	1
JIANG XZ	2	0	0	1	1	2	0	1	1	-	-	-	-	-	0	0	2	1
ZHAO XG	1	0	1	1	1	0	1	0	0	1	2	18	6	1	1	2	2	1
LV XX	0	0	0	1	1	0	1	1	1	-	-	-	-	-	1	2	2	1
YU DQ	2	0	0	0	1	0	1	0	1	0	0	20	10	0	1	2	2	1
GUO JH	1	0	0	1	0	0	0	0	1	1	1	40	20	1	1	2	2	1
SUN MJ	1	0	0	1	0	0	1	0	0	0	2	30	18	1	1	2	2	1
LIU ZH	1	0	0	1	0	2	0	1	1	-					0	0	2	1
LUO CM	1	0	1	0	0	2	0	0	1	0	0	45	15	2	1	2	2	1
HAO HL	2	1	1	1	0	1	1	1	0	-	-	-	-	-	1	2	2	1
SU ZP	0	0	1	0	0	0	1	0	0	1	0	36	23	1	1	2	2	1
DONG PJ	1	1	0	0	0	1	1	0	1	0	0	34	10	2	1	2	1	1
LI JB	2	0	1	1	0	0	0	0	1	1	1	25	10	1	1	2	2	1
WANG Z	0	0	0	1	0	0	1	0	0	0	2	35	8	2	1	2	2	1
PANG AJ	1	1	0	1	0	1	1	1	1	-	-	-	-	-	0	0	2	1
JI DF	1	1	0	1	1	1	0	1	1	-	-	-	-	-	1	2	2	1
LIU FX	0	1	1	0	0	0	1	0	0	0	1	30	12	1	1	2	2	1
WU LL	1	1	0	1	0	1	0	0	1	1	2	47	25	2	1	2	2	1
SUN ZH	1	0	0	1	1	1	0	0	1	0	0	15	5	0	1	2	2	1
WEI DW	2	0	0	1	1	1	0	1	1	-	-	-	-	-	1	2	2	1
TANG GL	1	0	0	1	0	2	0	1	1	-	-	-	-	-	0	0	2	1
WAN FX	0	0	1	0	0	0	0	1	1	-	-	-	-	-	1	2	2	1
WANG RQ	1	0	1	1	0	2	0	0	0	0	0	13	5	0	1	2	2	1
CHEN XF	2	0	0	1	1	2	1	0	1	0	0	40	12	2	1	2	2	0
SUN ZQ	1	1	1	0	0	0	1	1	1	-	-	-	-	-	1	2	2	1
LI ZJ	2	0	0	1	0	0	1	0	0	1	0	40	15	2	0	2	2	1
MA WM	0	1	1	1	0	0	1	1	1	-	-	-	-	-	1	2	2	1
WANG CP	1	1	0	1	1	1	1	0	1	0	0	33	15	1	1	2	2	1
WANG ZS	1	1	0	1	0	0	1	0	0	1	2	50	10	2	1	2	0	1
WANG CF	2	0	0	1	1	0	0	0	1	0	1	35	10	2	0	1	2	1
DAI JG	1	1	0	1	0	1	1	0	1	1	1	43	20	2	1	2	2	1
TAO ZS	2	1	1	0	0	2	0	0	1	0	1	45	20	2	1	2	2	1
FU XZ	1	1	1	0	0	1	0	0	1	0	0	43	10	2	1	2	2	1
LIU YF	1	0	0	1	0	0	1	0	1	0	0	35	20	1	1	2	2	1
